# Supplementary material for: Highly efficient and selective hydrogenation of chloronitrobenzenes to chloroanilines by H2 over confined silver nanoparticles
Source: Royal Society of Chemistry journal article supplement (doi:10.1039/c6ra02288j), 2016-01-01
Supplement: c6ra02288j1.pdf [file c6ra02288j1.pdf]

## Supporting Information

### Highly efficient and selective hydrogenation of chloronitrobenzenes to chloroanilines by H<sub>2</sub> over confined silver nanoparticles

Lini Yang<sup>a</sup>, Lina Xing<sup>a</sup>, Cunxia Cheng<sup>a</sup>, Lixin Xia<sup>a\*</sup> and Hongyang Liu<sup>b\*</sup>

a, Department of Chemistry, Liaoning University Shenyang, Liaoning 110036, China, e-mail:  
lixinxia@lnu.edu.cn

b, Shenyang National Laboratory for Materials Science, Institute of Metal Research, Chinese  
Academy of Sciences, Shenyang, 110016, China, e-mail: liuhy@imr.ac.cn

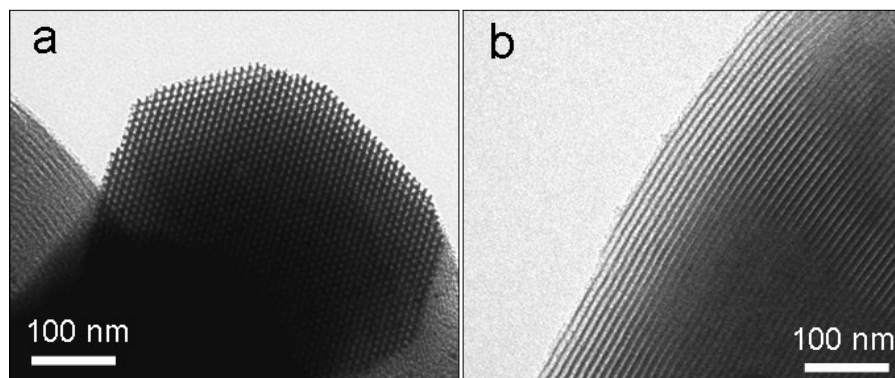

**Figure S1.** TEM images of SBA-15 with the diameter of around 7 nm.

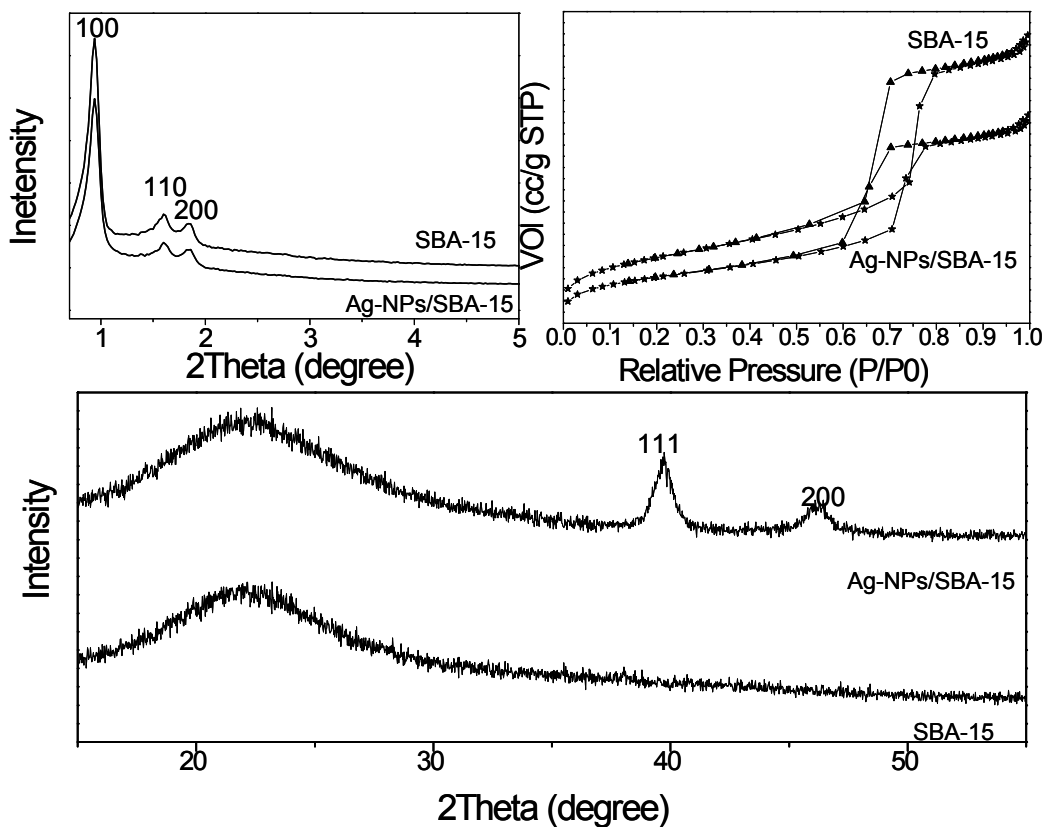

**Figure S2.** (a) The Low-angle XRD patterns, (b) Nitrogen-sorption isotherms and (c) the wide-angle XRD patterns of calcined SBA-15 and Ag-NPs/SBA-15 (4 wt%), respectively

**Table S1.** Physicochemical properties of selected samples

| Sample        | $S_{\text{BJH}}/\text{m}^2\text{g}^{-1}$ | $V_t/\text{cm}^3\text{g}^{-1}$ | $D_{\text{pore}}/\text{nm}$ |
|---------------|------------------------------------------|--------------------------------|-----------------------------|
| SBA-15        | 680                                      | 0.93                           | 6.8                         |
| Ag-NPs/SBA-15 | 570                                      | 0.75                           | 5.9                         |

$S_{\text{BJH}}$ , BJH specific surface area;  $V_t$ , total pore volume;  $D_{\text{BJH}}$ , pore diameter calculated using BJH method.

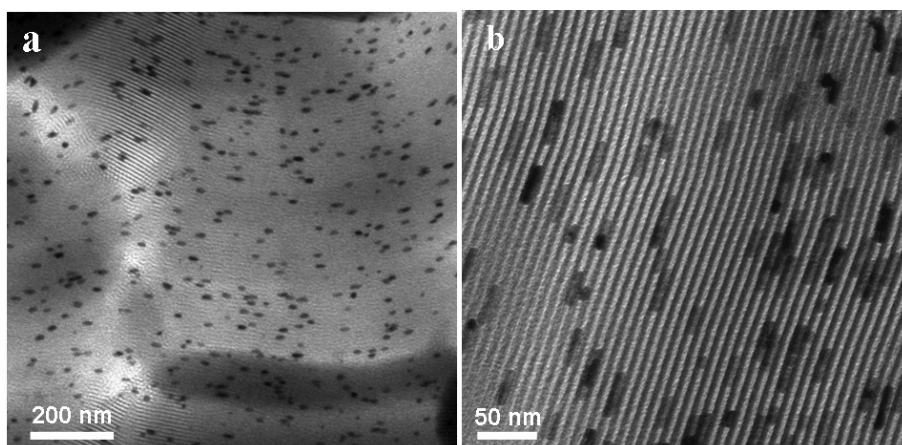

**Figure S3.** (a, b) TEM images of the as-synthesized Ag-NRs/SBA-15.

**Table S2.** Selective hydrogenation of various chloronitrobenzenes over Ag-NPs/SBA-15 catalyst.

| Entry | Substrate                 | Product              | Con (%) | Sel (%) |
|-------|---------------------------|----------------------|---------|---------|
| 1     | m-chloronitrobenzene      | m-chloroaniline      | 100     | >99     |
| 2     | p-chloronitrobenzene      | p-chloroaniline      | 100     | >99     |
| 3     | 1, 5-dichloronitrobenzene | 1, 5-dichloroaniline | 100     | >99     |

Reaction conditions: 0.1 g of the catalyst, 4 wt% Ag, 0.5 g of the substrate and 25 ml of ethanol,

T= 140 °C, P= 2 MPa, Time = 2.5 h.

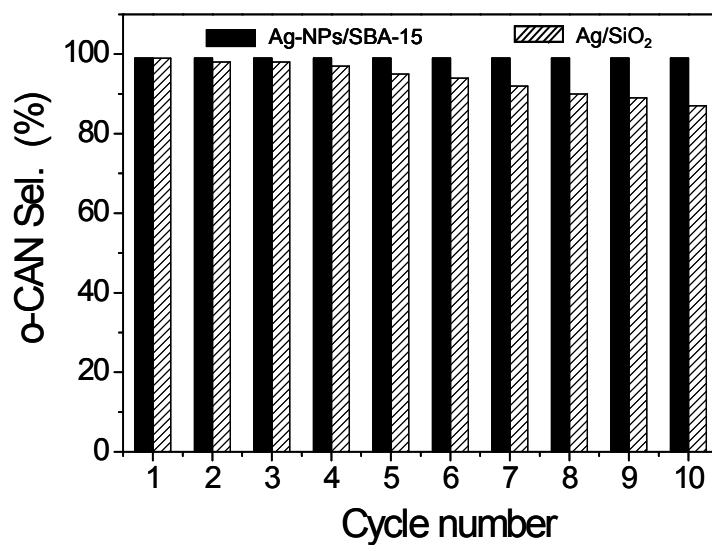

**Figure S4.** The selectivity of o-chloroaniline (o-CAN) over the Ag-NPs/SBA-15 and Ag/SiO<sub>2</sub> catalysts. Reaction conditions: 0.1 g of the catalyst, 4 wt% Ag, 0.5 g of the substrate and 25 ml of ethanol, T= 140 °C, P= 2 MPa, Time= 3 h.

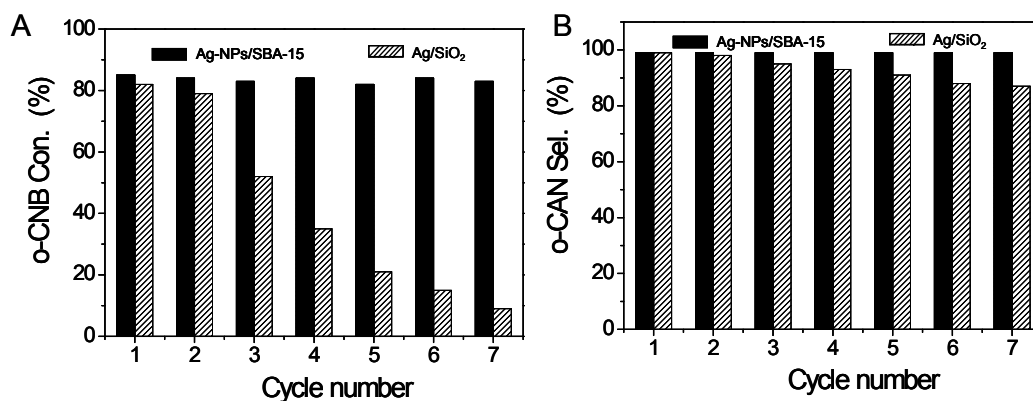

**Figure S5.** The hydrogenation of o-chloronitrobenzene (o-CNB) to o-chloroaniline (o-CAN) over the Ag-NPs/SBA-15 and Ag/SiO<sub>2</sub> catalysts. Reaction conditions: 0.1 g of the catalyst, 4 wt% Ag, 0.5 g of the substrate and 25 ml of ethanol, T= 140 °C, P= 2 MPa, Time= 2.5 h.
